# Supplementary material
Source: HighWire-hosted journal article supplement (http://www.cmaj.ca/highwire/filestream/73936/field_highwire_adjunct_files/2/190366-res-3-at.pdf)

**Appendix 3 (as supplied by the authors):** Figure S2. Temporal trends in obstetric anal sphincter injury stratified by parity, obstetric history and episiotomy among all women. Asterisks denote a P-values<0.05 for the Cochran-Armitage test for linear trend in proportions.

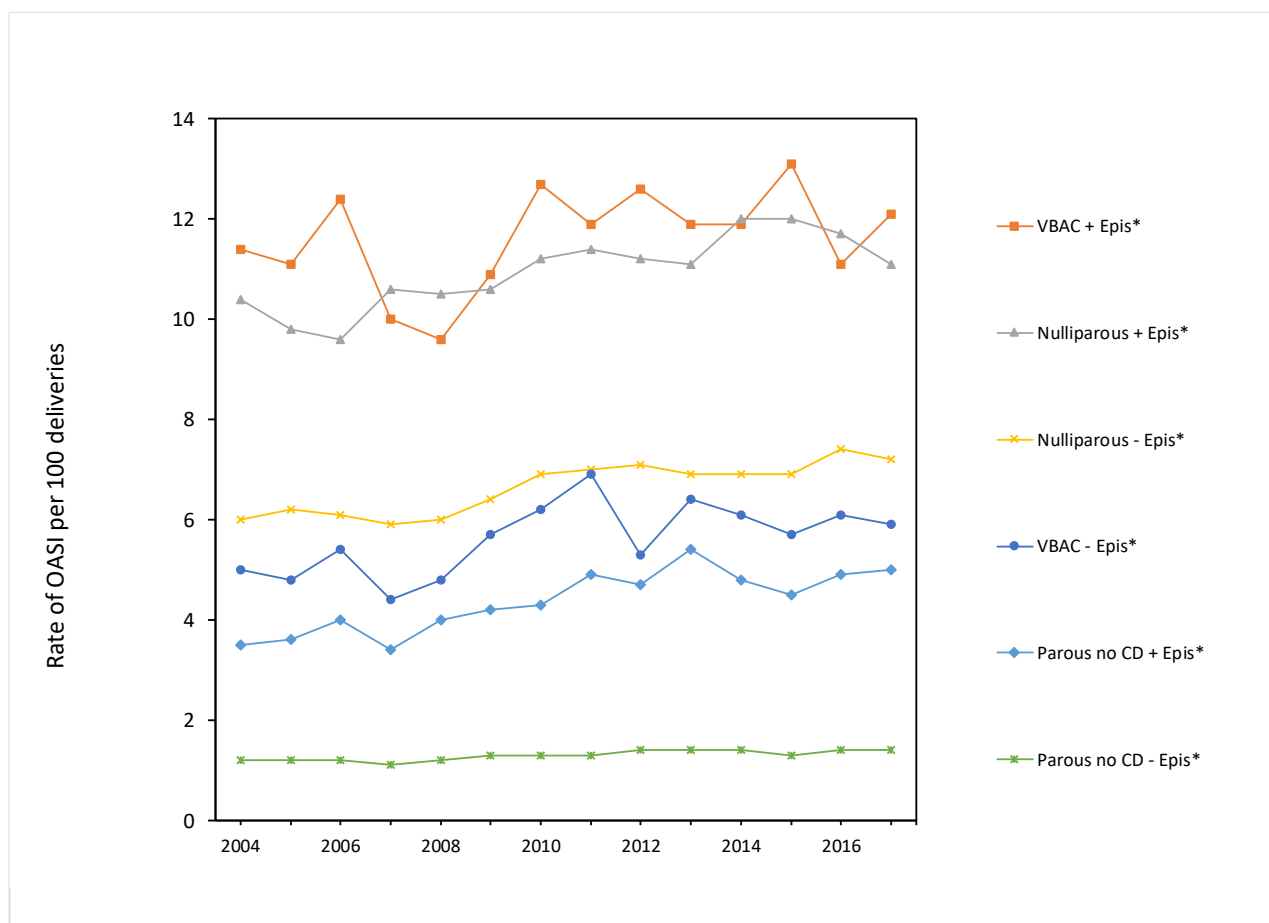

Supplement: 190366-res-3-at.pdf [file 190366-res-3-at.pdf]
